# Supplementary material for: PFAS surveillance within a highly militarized island: a case study of Okinawa, Japan
Source: Royal Society of Chemistry journal article supplement (doi:10.1039/d4em00508b), 2024-12-03
Supplement: d4em00508b2.xlsx [file d4em00508b2.xlsx]

## Sheet: S1 Final PFAS Conc.
Sample	PFBS	PFPeA	FBSA	PFPeS	4:2 FTS	PFHxA	PFHxS	PFHpA	PFOA	FHxSA	Br-PFOS	PFOS	PFNA	PFDA	8:2 FTS	PFUDA	SUM(PFAS)
OKI_01	NF	NF	NF	NF	0.0573384	0.840975	NF	NF	<LOQ	NF	NF	0.423228	0.099983	NF	0.141579	NF	1.5631
OKI_02	NF	NF	NF	NF	NF	NF	NF	5.48138	NF	NF	NF	<LOQ	NF	NF	NF	NF	5.48138
OKI_03	NF	NF	NF	NF	NF	NF	<LOQ	NF	0.247161	NF	0.712987	0.277669	0.355064	0.589456	NF	NF	2.18234
OKI_04	NF	NF	NF	NF	NF	NF	NF	NF	NF	NF	NF	<LOQ	NF	NF	NF	NF	<LOQ
OKI_05	NF	NF	NF	NF	NF	NF	NF	NF	NF	NF	0.398638	<LOQ	0.127014	NF	NF	NF	0.525652
OKI_06	NF	NF	NF	NF	<LOQ	0.546179	NF	NF	0.0843271	NF	NF	<LOQ	NF	NF	NF	NF	0.630506
OKI_07	NF	NF	NF	NF	<LOQ	0.494799	NF	NF	<LOQ	NF	0.612136	0.263254	0.088041	NF	NF	NF	1.45823
OKI_08	NF	NF	NF	NF	<LOQ	<LOQ	NF	NF	0.0874983	NF	NF	<LOQ	0.1187	<LOQ	0.0764821	NF	0.282681
OKI_09	NF	NF	NF	NF	NF	NF	NF	NF	<LOQ	NF	NF	<LOQ	NF	NF	NF	NF	<LOQ
OKI_10	NF	NF	NF	NF	NF	NF	NF	NF	0.0885889	NF	NF	<LOQ	NF	NF	NF	NF	0.0885889
OKI_11	1.10465	7.44709	1.8677	1.35789	NF	6.44821	14.1076	4.06882	2.93215	3.26509	23.9343	17.7586	0.651757	0.659767	NF	0.241356	85.8449
OKI_12	1.90093	20.8039	2.47988	3.01644	<LOQ	19.4102	26.2844	8.05831	5.76554	2.88901	52.53	20.5946	0.558924	NF	0.0480344	NF	164.34
OKI_13	NF	NF	NF	NF	0.103413	0.939057	NF	NF	<LOQ	NF	1.69827	0.433893	0.0938961	NF	0.204804	NF	3.47333
OKI_14	NF	NF	NF	NF	<LOQ	0.556742	NF	NF	NF	NF	NF	0.306075	NF	NF	0.0343508	NF	0.897168
OKI_15	NF	NF	NF	NF	<LOQ	<LOQ	NF	94.8431	NF	NF	NF	<LOQ	NF	0.595103	0.114886	NF	95.5531
OKI_16	NF	NF	NF	NF	NF	NF	NF	NF	NF	NF	NF	<LOQ	NF	NF	NF	NF	<LOQ
OKI_17	NF	NF	NF	NF	NF	NF	NF	85.5317	NF	NF	2.78037	3.50215	NF	NF	NF	NF	91.8142
OKI_18	NF	NF	NF	NF	<LOQ	NF	NF	122.371	NF	NF	3.18046	0.690732	NF	NF	0.111545	NF	126.354
OKI_19	NF	NF	NF	NF	NF	<LOQ	NF	NF	0.0821693	NF	NF	<LOQ	NF	NF	NF	NF	0.0821693
OKI_20	NF	NF	NF	NF	NF	NF	NF	NF	<LOQ	NF	NF	0.0760755	0.083689	NF	NF	NF	0.159764
OKI_21	NF	NF	NF	NF	NF	NF	NF	NF	NF	NF	NF	0.0015957	NF	NF	NF	NF	0.0015957
OKI_22	NF	NF	NF	NF	NF	NF	NF	NF	NF	NF	1.17272	<LOQ	NF	NF	NF	NF	1.17272
OKI_23	NF	NF	NF	NF	NF	NF	NF	<LOQ	0.429946	NF	0.965156	<LOQ	0.170209	0.569091	NF	NF	2.1344
OKI_24	NF	NF	NF	NF	NF	NF	NF	NF	NF	NF	0.825684	<LOQ	NF	NF	NF	NF	0.825684
OKI_25	NF	NF	NF	NF	NF	NF	NF	NF	NF	NF	NF	0.202243	0.121248	NF	NF	NF	0.323491
OKI_26	NF	1.17872	NF	NF	NF	1.20109	NF	NF	0.925113	NF	3.1842	0.376473	0.180305	0.599195	NF	NF	7.64509
OKI_27	NF	NF	NF	NF	NF	NF	NF	NF	0.498219	NF	1.4025	<LOQ	0.153644	NF	NF	NF	2.05437
OKI_28	<LOQ	<LOQ	NF	NF	NF	0.693344	3.18264	NF	2.32525	NF	4.47386	0.356688	0.121778	NF	NF	NF	11.1536
OKI_29	NF	NF	NF	NF	<LOQ	<LOQ	NF	NF	0.0967721	NF	1.20285	0.00319533	0.0963446	NF	0.017314	NF	1.41648
OKI_30	4.58094	6.79663	2.89624	2.03238	<LOQ	14.1605	24.9527	2.94865	40.3579	7.78002	25.2734	10.4913	1.30703	0.669835	NF	NF	144.248
OKI_31	NF	NF	NF	NF	<LOQ	NF	NF	NF	0.136678	NF	0.55538	0.237829	0.0965272	NF	<LOQ	NF	1.02641
OKI_32	NF	NF	NF	NF	NF	NF	NF	NF	0.141372	NF	1.9112	0.1773	0.0907757	NF	NF	NF	2.32065
OKI_33	NF	NF	NF	NF	NF	NF	NF	NF	0.217665	NF	NF	0.640993	NF	NF	NF	NF	0.858657
OKI_34	NF	NF	NF	NF	NF	NF	NF	NF	NF	NF	NF	0.0534266	NF	NF	NF	NF	0.0534266
OKI_35	NF	NF	NF	NF	NF	NF	NF	13.3546	<LOQ	NF	0.693015	<LOQ	0.193087	<LOQ	NF	NF	14.2407
OKI_36	NF	NF	NF	NF	NF	NF	NF	NF	NF	NF	NF	0.164373	0.426456	NF	NF	0.260441	0.85127
OKI_37	NF	NF	NF	NF	NF	NF	NF	<LOQ	NF	NF	NF	<LOQ	0.10309	NF	NF	NF	0.10309
OKI_38	NF	NF	NF	NF	<LOQ	<LOQ	NF	NF	0.0715494	NF	1.22287	0.0645067	0.0978143	NF	NF	NF	1.45674
OKI_39	NF	<LOQ	NF	NF	NF	<LOQ	NF	NF	0.449222	NF	1.48191	0.38127	0.185955	0.569322	NF	NF	3.06768
OKI_40	NF	NF	NF	NF	NF	NF	NF	NF	NF	NF	NF	0.035115	0.170585	NF	NF	NF	0.2057
OKI_41	NF	NF	NF	NF	NF	NF	NF	NF	NF	NF	0.807102	0.1454	NF	NF	NF	NF	0.952502
OKI_42	NF	NF	NF	NF	<LOQ	NF	NF	NF	NF	NF	1.8687	0.655995	0.378134	0.629454	<LOQ	0.236574	3.76886
OKI_43	NF	NF	NF	NF	<LOQ	NF	NF	NF	0.32855	NF	0.81616	0.351247	0.39521	0.57938	<LOQ	NF	2.47055
OKI_44	NF	NF	NF	NF	<LOQ	NF	NF	11.5062	0.352306	NF	0.320141	0.0912346	0.228998	NF	0.0448783	NF	12.5438
OKI_45	NF	NF	NF	NF	NF	NF	NF	15.8136	NF	NF	0.596045	<LOQ	NF	NF	NF	NF	16.4097
OKI_46	NF	<LOQ	NF	NF	NF	0.945727	2.54805	NF	0.988896	2.99084	10.1255	4.37535	0.374108	0.744629	NF	0.234006	23.3271
OKI_47	NF	NF	NF	NF	NF	<LOQ	<LOQ	NF	0.223131	NF	1.85002	0.621154	0.210886	NF	NF	NF	2.90519
OKI_48	NF	NF	NF	NF	NF	2.29978	2.20314	NF	1.59078	NF	5.58534	1.81013	0.673001	0.742058	NF	0.292206	15.1964
OKI_49	NF	NF	NF	NF	NF	NF	NF	NF	0.112355	NF	1.11434	0.377412	0.129068	<LOQ	NF	NF	1.73318
OKI_50	NF	NF	NF	NF	NF	NF	NF	31.0706	1.05211	NF	1.02607	0.530621	0.389264	0.617611	NF	NF	34.6862
OKI_51	NF	2.68558	NF	NF	NF	1.96733	2.08536	2.0999	0.959359	NF	4.70846	3.31225	0.313411	NF	NF	NF	18.1317
OKI_52	NF	0.490389	NF	NF	NF	0.473525	1.48551	NF	0.282206	NF	9.25631	7.03699	0.11941	NF	NF	NF	19.1443
OKI_53	0.398341	0.471473	NF	NF	<LOQ	0.565588	NF	NF	0.148993	NF	2.41059	1.70541	0.116414	NF	NF	NF	5.81681
OKI_54	NF	<LOQ	NF	NF	<LOQ	<LOQ	NF	NF	0.261548	NF	1.5213	0.431275	0.109824	NF	NF	NF	2.32395
OKI_55	NF	<LOQ	NF	NF	NF	<LOQ	NF	NF	0.137456	NF	1.43078	0.830156	0.0989991	NF	NF	NF	2.49739
OKI_56	1.98352	0.552539	NF	NF	NF	0.578586	2.4284	NF	0.484797	NF	33.1871	1.65091	NF	NF	NF	NF	40.8659
OKI_57	NF	NF	NF	NF	NF	NF	NF	NF	<LOQ	NF	0.786244	0.143163	NF	NF	NF	NF	0.929407
OKI_58	NF	NF	NF	NF	NF	NF	NF	NF	NF	NF	1.4738	0.0733716	0.14318	NF	NF	NF	1.69035
OKI_59	NF	NF	NF	NF	NF	NF	NF	<LOQ	<LOQ	NF	1.38783	0.29439	0.104572	NF	NF	NF	1.78679
OKI_60	<LOQ	NF	NF	NF	NF	0.432061	NF	NF	0.279961	NF	1.51689	0.24678	0.0993523	NF	NF	NF	2.57504
OKI_61	NF	NF	NF	NF	<LOQ	NF	NF	2.58506	0.0814021	NF	3.10494	0.721421	NF	NF	NF	NF	6.49283
Instances where no peak was detected are signified by 'NF'

## Sheet: S2 Sampling Coordinates
Site name	Sample ID	Latitude	Longitude	Water Type	Notes
Churaterasu	OKI01	26.6788	128.013	Coastal
Chura Sun Beach	OKI02	26.1535	127.647	Coastal
Senaga Island	OKI03	26.1771	127.64	Coastal
Kyan Fishing Port	OKI04	26.0946	127.658	Coastal
Hanagusuku Beach	OKI05	26.1147	127.745	Coastal	Near golf course; lots of plastic debris
Mirabu Beach	OKI06	26.1344	127.791	Coastal
Azama Ferry Port	OKI07	26.1792	127.827	Coastal
Yonabaru Marina	OKI08	26.2068	127.767	Coastal
Motubu Port	OKI09	26.6412	127.88	Coastal
Play Beach Shinto Shrine	OKI10	26.59	127.965	Coastal
Kadena South	OKI11	26.3395	127.747	Coastal	Coast just south of Kadena AFB; plastic, glass, ceramic, and tire debris
Kadena North	OKI12	26.3472	127.745	Coastal	Coast just north of Kadena AFB; recreational area; sewage pump station nearby
Maeganeku Port	OKI13	26.4472	127.803	Coastal
Shioya Bay	OKI14	26.6625	128.107	Inland	In bay near stormwater outflow; potenially set up for aquaculture in the port
Yona River	OKI15	26.7661	128.204	Inland	Near outflow of a stormwater drain
Hedo Dome	OKI16	26.8645	128.246	Coastal	collected from boat near the entrance of the Hedo Dome cave\
Hedo Coast Stream	OKI17	26.8641	128.265	Inland	Stream flowing into the ocean; water pumping station nearby
Oku River Yamburu National Park	OKI18	26.8357	128.288	Inland	Sampled inside the national park
Oku Fishing Port	OKI19	26.8445	128.29	Coastal	Small port without any boats
Oku Beach	OKI20	26.8519	128.28	Coastal	Popular surfing beach; plastic debris
Beach at Mouth of Le River	OKI21	26.8085	128.319	Coastal	Public restrooms (without sewage system) nearby, campground on beach
Ibu Beach Yamburu Wildlife Reserve	OKI22	26.7547	128.323	Coastal
Ada Inland Mangrove	OKI23	26.7446	128.314	Inland
Ada Port	OKI24	26.7412	128.319	Coastal
Aha River	OKI25	26.7162	128.293	Coastal
Mouth of Ishikama River	OKI26	26.432	127.831	Coastal	Near industrial area; stormwater drain nearby with foam
Igei Seaside Park	OKI27	26.4548	127.875	Coastal	Near sewage treatment plant
Kin Red Harbor	OKI28	26.4479	127.912	Coastal	Farmland near military area (Camp Hansen/Schwab Marine Corps Bases)
Kin Red Beach	OKI29	26.4457	127.943	Coastal	Seaweed farming immediately off the coast; near military area (Camp Hansen/Schwab Marine Corps Bases); near stormwater drain
Ukka Gaa Spring	OKI30	26.4545	127.928	Groundwater	Cultrural spring; public access used for bathing
Kanna Fishing Port	OKI31	26.4732	127.956	Coastal	Murky water
Hiramatsu Hotel Beach	OKI32	26.4875	128.003	Coastal	Big stormwater runoff area; tire debris on beach
Sand Dollar Beach Kushi	OKI33	26.5144	128.009	Coastal
Henoko Fishing Port	OKI34	26.5142	128.009	Coastal
Wansaka Oura Park	OKI35	26.5522	128.039	Coastal	Near military area (Camp Hansen/Schwab Marine Corps Bases)
Oura River	OKI36	26.5601	128.044	Inland
Sesoko Station	OKI37	26.6359	127.865	Coastal	Near boat ramp of Sesoko Research station; corals present in water visible from surface
Busena Marine Park	OKI38	26.5371	127.934	Coastal
Nabee Beach Fishing Port	OKI39	26.5004	127.857	Coastal
Gankao River	OKI40	26.6307	128.058	Inland	River flowing through farmland
Gesahi Uppama Beach	OKI41	26.6008	128.151	Coastal
Shinkawa River	OKI42	26.6656	128.25	Inland
Fukuji Dam	OKI43	26.6477	128.176	Inland	Recreational boating/kayaking area present at the dam
Waki Dam	OKI44	26.6489	128.148	Inland
Todoroki Waterfall	OKI45	26.5669	127.987	Inland
Ginowan Marina	OKI46	26.2798	127.73	Coastal
Meigusuku Port	OKI47	26.2191	127.663	Coastal	Recreational port with nearby airport
Nagado River	OKI48	26.1956	127.7	Inland
Tomari Power Station	OKI49	26.2746	127.81	Coastal
Kurashiki Dam	OKI50	26.3874	127.804	Inland	Garbge dump nearby
Tengan Pier	OKI51	26.4057	127.843	Coastal	Two large stormwater drains nearby
Uken Beach	OKI52	26.3855	127.875	Coastal	Recreational area between military area (Camp Courtney) and a thermal power plant
Urema Recycle Plant	OKI53	26.307	127.897	Coastal	Nearby stormwater drain
Uragahama Park	OKI54	26.3072	127.923	Coastal
Okinawa Petroleum Base Co.	OKI55	26.3571	127.97	Coastal	Nearby stormwater drain
Tachi Chiga Miyajima Well	OKI56	26.375	127.983	Groundwater
Keramas Islands	OKI57	26.2498	127.334	Coastal
Uka Coast	OKI58	26.808	128.234	Coastal
Oganeku Coast	OKI59	26.7055	128.135	Coastal
Emerald Beach	OKI60	26.6981	127.877	Coastal
Senaha Coast	OKI61	26.4246	127.734	Coastal

## Sheet: S3 Internal Standard
Istopically Labeled Standards	Conc. in Diluted Stock Solution (ppb)	Final Conc. In 1 mL of Sample (ppt)
M4PFBA	50.5259	1.26315
M5PFPeA	50.5259	1.26315
M5PFHxA	50.5259	1.26315
M4PFHpA	50.5259	1.26315
M8PFOA	50.5259	1.26315
M9PFNA	50.5259	1.26315
M6PFDA	50.5259	1.26315
M7PFUdA	50.5259	1.26315
MPFDoA	50.5259	1.26315
M2PFTeDA	50.5259	1.26315
M8FOSA	50.5259	1.26315
d3-N-MeFOSAA	50.5259	1.26315
d5-N-EtFOSAA	50.5259	1.26315
M3PFBS	46.9386	1.17346
M3PFHxS	47.7975	1.19494
M8PFOS	48.3533	1.20883
M2-4:2FTS	47.2417	1.18104
M2-6:2FTS	47.9491	1.19873
M2-8:2FTS	48.4038	1.2101

## Sheet: S4 PFAS Abbreviations
PFAS	Acronym	Formula	Corresponding IS
Perfluorobutanoic acid	PFBA	C4HF7O2	M4PFBA
Perfluoropentanoic acid	PFPeA	C5HF9O2	M5PFPeA
Perfluorohexanoic acid	PFHxA	C6HF11O2	M5PFHxA
Perfluoroheptanoic acid	PFHpA	C7HF13O2	M4PFHpA
Perfluorooctanoic acid	PFOA	C8HF15O2	M8PFOA
Perfluorononanoic acid	PFNA	C9HF17O2	M9PFNA
Perfluorodecanoic acid	PFDA	C10HF19O2	M6PFDA
Perfluoroundecanoic acid	PFUdA	C11HF21O2	M7PFUdA
Perfluorododecanoic acid	PFDoA	C12HF23O2	M2PFDoA
Perfluorotridecanoic acid	PFTrDA	C13HF25O2	M2PFTeDA
Perfluorotetradecanoic acid	PFTeDA	C14HF27O2	M2PFTeDA
Perfluorobutanesulfonic acid	PFBS	C4HF9O3S	M3PFBS
Perfluoropentanesulfonic acid	PFPeS	C5HF11O3S	MPFHxS
Perfluorohexanesulfonic acid	PFHxS	C6HF13O3S	MPFHxS
Perfluoroheptanesulfonic acid	PFHpS	C7HF15O3S	M8PFOS
Perfluorooctanesulfonic acid	L-PFOS	C8HF17O3S	M8PFOS
Sodium perfluoro-3-methylheptanesulfonate	Br-PFOS (NaP3MHpS)	C8HF17O3S	M8PFOS
Perfluorononanesulfonic acid	PFNS	C9HF19O3S	M8PFOS
Perfluorodecanesulfonic acid	PFDS	C10HF21O3S	M8PFOS
Hexafluoropropylene oxide dimer acid	HFPO-DA (Gen-X)	C6HF11O3	MGenx1
Sodium 4,8-dioxa-3H-perfluorononanoate	NaDONA	C7HF12NaO4	M4PFHpA
Perfluorobutane sulfonamide	FBSA	C4H2F9NO2S	M5PFHxA
Perfluorohexane sulfonamide	FHxSA	C6H2F13NO2S	M8PFOA
Perfluoro-1-octanesulfonamide	FOSA	C8H2F17NO2S	M8FOSA
N-methylperfluoro-1-octanesulfonamidoacetic acid	N-MeFOSAA	C11H6F17NO4S	d3-N-MeFOSAA
n-ethylperfluoro-1-octanesulfonamidoacetic acid	N-EtFOSAA	C12H8F17NO4S	d5-EtFOSAA
4:2 fluorotelomer sulfonic acid	4:2FTS	C6H5F9O3S	M2-4:2FTS
6:2 fluorotelomer sulfonic acid	6:2FTS	C8H5F13O3S	M2-6:2FTS
8:2 fluorotelomer sulfonic acid	8:2FTS	C10H5F17O3S	M2-8:2FTS
9-chlorohexadecafluoro-3-oxanonane-1-sulfonic acid	9Cl-PF3ONS (6:2 Cl-PFESA)	C8ClF16KO4S	M6PFDA
11-chloroeicosafluoro-3-oxaundecane-1-sulfonic acid	11Cl-PF3OUdS (8:2 Cl-PFESA)	C10ClF20KO4S	M2PFDoA

## Sheet: S5 SRM Transitions
Compound	Type	Retention Time (min)	RT Window (min)	Precursor (m/z)	Product (m/z)	Collision Energy (V)	Min Dwell Time (ms)	RF Lens (V)
PFBA	Target Compound	2.16	0.8	213.05	169	7.86	5.626	93
M4PFBA	Extracted Internal Standard	2.16	0.8	216.96	172.04	7.95	5.626	65
PFBS	Target Compound	2.27	0.8	299.01	80.07	31.03	5.626	112
M3PFBS	Extracted Internal Standard	2.27	0.8	301.95	80.03	31.62	5.626	161
PFPeA	Target Compound	2.28	0.8	262.96	219.06	7.23	5.626	72
M5PFPeA	Extracted Internal Standard	2.28	0.8	267.9	223	7.74	5.626	72
PFPeS1	Target Compound	2.38	0.8	348.71	80.03	35.08	5.626	179
PFPeS2	Target Compound	2.38	0.8	348.71	99.04	31.33	5.626	179
PFHxA2	Target Compound	2.39	0.8	313.01	119	17.85	5.626	78
PFHxA1	Target Compound	2.39	0.8	313.01	269	7.86	5.626	78
M5PFHxA	Extracted Internal Standard	2.39	0.8	317.96	272.97	7.61	5.626	78
4:2FTS	Target Compound	2.39	0.8	327	306.83	17.47	5.626	149
M2-4:2FTS	Extracted Internal Standard	2.39	0.8	329.06	81	25.81	5.626	135
Gen-X	Target Compound	2.43	0.8	285	169.06	5.25	5.626	145
M2Genx1	Extracted Internal Standard	2.43	0.8	287	169.03	5.25	5.626	145
FBSA	Target Compound	2.43	0.8	297.95	78.04	23.74	5.626	132
PFHxS1	Target Compound	2.49	0.8	398.81	79.97	36.3	5.626	171
PFHxS2	Target Compound	2.49	0.8	398.81	318.92	22.52	5.626	171
M3PFHxS	Extracted Internal Standard	2.49	0.8	401.9	80.1	30	5.626	170
PFHpA	Target Compound	2.52	0.8	362.91	319.04	7.95	5.626	119
M4PFHpA	Extracted Internal Standard	2.52	0.8	367	322.04	6.81	5.626	119
NADONA2	Target Compound	2.52	0.8	377.03	85	27.96	5.626	110
NADONA1	Target Compound	2.52	0.8	377.03	251.03	9.8	5.626	110
PFHpS1	Target Compound	2.66	0.8	448.85	79.97	39.33	5.626	235
PFHpS2	Target Compound	2.66	0.8	448.85	99	38.02	5.626	235
PFOA2	Target Compound	2.69	0.8	412.98	169	15.95	5.626	120
PFOA1	Target Compound	2.69	0.8	412.98	369	8.07	5.626	120
M8PFOA	Extracted Internal Standard	2.69	0.8	421	376.03	8.07	5.626	120
6:2FTS	Target Compound	2.69	0.8	427	406.92	21.64	5.626	133
M2-6:2FTS	Extracted Internal Standard	2.69	0.8	429	408.96	21.85	5.626	134
FHxSA1	Target Compound	2.75	0.8	397.91	78.04	27.58	5.626	174
FHxSA2	Target Compound	2.75	0.8	397.91	169.03	24.97	5.626	174
BR-PFOS	Target Compound	2.77	0.8	498.96	130.01	39.2	5.626	227
L-PFOS1	Target Compound	2.88	0.8	498.85	80.03	42.19	5.626	219
L-PFOS2	Target Compound	2.88	0.8	498.85	98.97	40.05	5.626	219
M8PFOS	Extracted Internal Standard	2.88	0.8	507	80.03	42.66	5.626	219
PFNA2	Target Compound	2.9	0.8	463.01	219	15.53	5.626	121
PFNA1	Target Compound	2.9	0.8	463.01	418.96	9.17	5.626	121
M9PFNA	Extracted Internal Standard	2.9	0.8	471.95	426.89	9	5.626	121
9Cl-PF3ONS	Target Compound	3.01	0.8	530.91	350.93	24.33	5.834	199
PFNS1	Target Compound	3.16	0.8	548.96	80.04	42.78	6.331	299
PFNS2	Target Compound	3.16	0.8	548.96	99.04	43.58	6.331	299
PFDA2	Target Compound	3.22	0.8	512.98	268.96	15.19	7.376	113
PFDA1	Target Compound	3.22	0.8	512.98	468.99	9.38	7.376	113
M6PFDA	Extracted Internal Standard	3.22	0.8	518.95	473.98	9.42	7.376	160
8:2FTS	Target Compound	3.24	0.8	527	506.92	25.47	7.692	237
M2-8:2FTS	Extracted Internal Standard	3.24	0.8	529	508.88	24.12	7.692	197
FOSA1	Target Compound	3.38	0.8	497.76	78.04	31.03	8.722	207
FOSA2	Target Compound	3.38	0.8	497.76	477.91	23.96	8.722	207
M8FOSA	Extracted Internal Standard	3.38	0.8	506	78.01	32.25	8.722	172
N-MeFOSAA1	Target Compound	3.46	0.8	569.95	418.93	18.69	8.722	194
N-MeFOSAA2	Target Compound	3.46	0.8	569.95	482.96	13.97	8.722	194
d3-N-MeFOSAA	Extracted Internal Standard	3.46	0.8	573	419	18.69	8.722	194
PFDS	Target Compound	3.58	0.8	598.91	80.04	45.52	10.518	299
PFUdA2	Target Compound	3.64	0.8	562.81	269.03	17.09	10.518	117
PFUdA1	Target Compound	3.64	0.8	562.81	518.99	9.72	10.518	117
M7PFUdA	Extracted Internal Standard	3.64	0.8	570	524.96	8.96	10.518	127
N-EtFOSAA1	Target Compound	3.69	0.8	584	418.96	18.31	10.538	184
N-EtFOSAA2	Target Compound	3.69	0.8	584	525.92	18.35	10.538	184
d5-EtFOSAA	Extracted Internal Standard	3.69	0.8	589	530.93	19.53	10.538	187
11Cl-PF3OUdS	Target Compound	3.84	0.8	630.81	450.89	26.99	12.305	299
PFDoA2	Target Compound	4.23	0.8	612.76	318.97	18.1	19.444	126
PFDoA1	Target Compound	4.23	0.8	612.76	568.92	10.52	19.444	126
M2PFDoA	Extracted Internal Standard	4.23	0.8	614.91	569.91	10.31	19.444	130
PFTrDA2	Target Compound	4.96	0.8	662.71	268.9	20.12	58.121	139
PFTrDA1	Target Compound	4.96	0.8	662.71	618.96	11.15	58.121	139
PFTeDA2	Target Compound	5.68	0.8	712.76	418.92	18.86	58.121	145
PFTeDA1	Target Compound	5.68	0.8	712.76	668.96	10.86	58.121	145
M2PFTeDA	Extracted Internal Standard	5.68	0.8	714.91	669.96	10.86	58.121	141
66PFPi2	Target Compound	6.6	0.8	700.962	63.042	51.67	148.856	299
66PFPi1	Extracted Internal Standard	6.6	0.8	700.962	400.875	47.71	148.856	299
Target analytes that end with a '1' or '2' were scanned for two transitions. The most abundant transition ('1') was used for quantitation and the other ('2') was used for confirmation. For target analytes not ending with a '1' or '2' a second transition does not exist.

## Sheet: S6 Instrument Parameters
LC Conditions (Thermo Scientific Vanquish HPLC)
Column	Gemini Phenomenex C18 100 mm × 2 mm; 3 µm
Mobile phases	Water (A) and methanol (B), both containing 5 mM ammonium acetate
Gradient elution	0-0.5 min 90% B, 1-3 min 18% B, 3.5-4 min 16% B, 4.5-5 min 10% B, 7 min 5% B, 7.5-9 min 1% B, 10-12 min 90% B
Flow rate	0.3 mL/min
Column temperature	40°C
Autosampler temperature	4°C
Injection volume	10 µL
Ion Source Parameters (Thermo Quantis MS/MS)
Ion source type	H-ESI
Spray voltage	Static
Negative ion	-3857 V
Sheath gas	57 Arb
Aux gas	4 Arb
Sweep gas	4 Arb
Ion transfer tube temperature	325°C
Vaporizer temp	350°C

## Sheet: S7 QC Results
Target Analyte	% Recovery	% RSD
PFBS	0.912315	0.0774403
PFPeA	0.959694	0.0353778
FBSA	1.04385	0.0405038
PFPeS	0.971213	0.069023
4:2 FTS	0.865571	0.137505
PFHxA	0.977912	0.0194184
PFHxS	0.965839	0.0870689
PFHpA	0.943538	0.0198285
PFOA	0.969216	0.0481655
FHxSA	1.07361	0.0439349
Br-PFOS	0.992812	0.146509
PFOS	0.931259	0.24003
PFNA	0.971095	0.0310866
PFDA	1.0643	0.0442477
8:2 FTS	0.953691	0.137803
PFUDA	0.926591	0.0372698
